# Supplementary material for: Understanding the role of interfacial layers in the photostability of PM6:Y7-based organic solar cells under different degradation conditions
Source: Royal Society of Chemistry journal article supplement (doi:10.1039/d3se00703k), 2023-01-01
Supplement: d3se00703k1.pdf [file d3se00703k1.pdf]

## Supplementary Information

# Understanding the Role of Interface Layers in the Photostability of PM6:Y7-based Organic Solar Cells under Different Degradation Conditions

Magaly Ramírez-Como<sup>a</sup>, Enas Moustafa<sup>a</sup>, Mohamed Samir<sup>a</sup>, Alfonsina Abat Amelenan Torim tubun<sup>a</sup>, José G. Sánchez<sup>b</sup>, Josep Pallarès<sup>\*a</sup>, and Lluís F. Marsal<sup>\*a</sup>

<sup>a</sup> Department of Electric, Electronic and Automatic Engineering, Universitat Rovira i Virgili, 43007 Tarragona, Spain. E-mail: josep.pallares@urv.cat; lluis.marsal@urv.cat

<sup>b</sup> Institute of Chemical Research of Catalonia, The Barcelona Institute of Science and Technology (ICIQ-BIST), 43007 Tarragona, Spain.

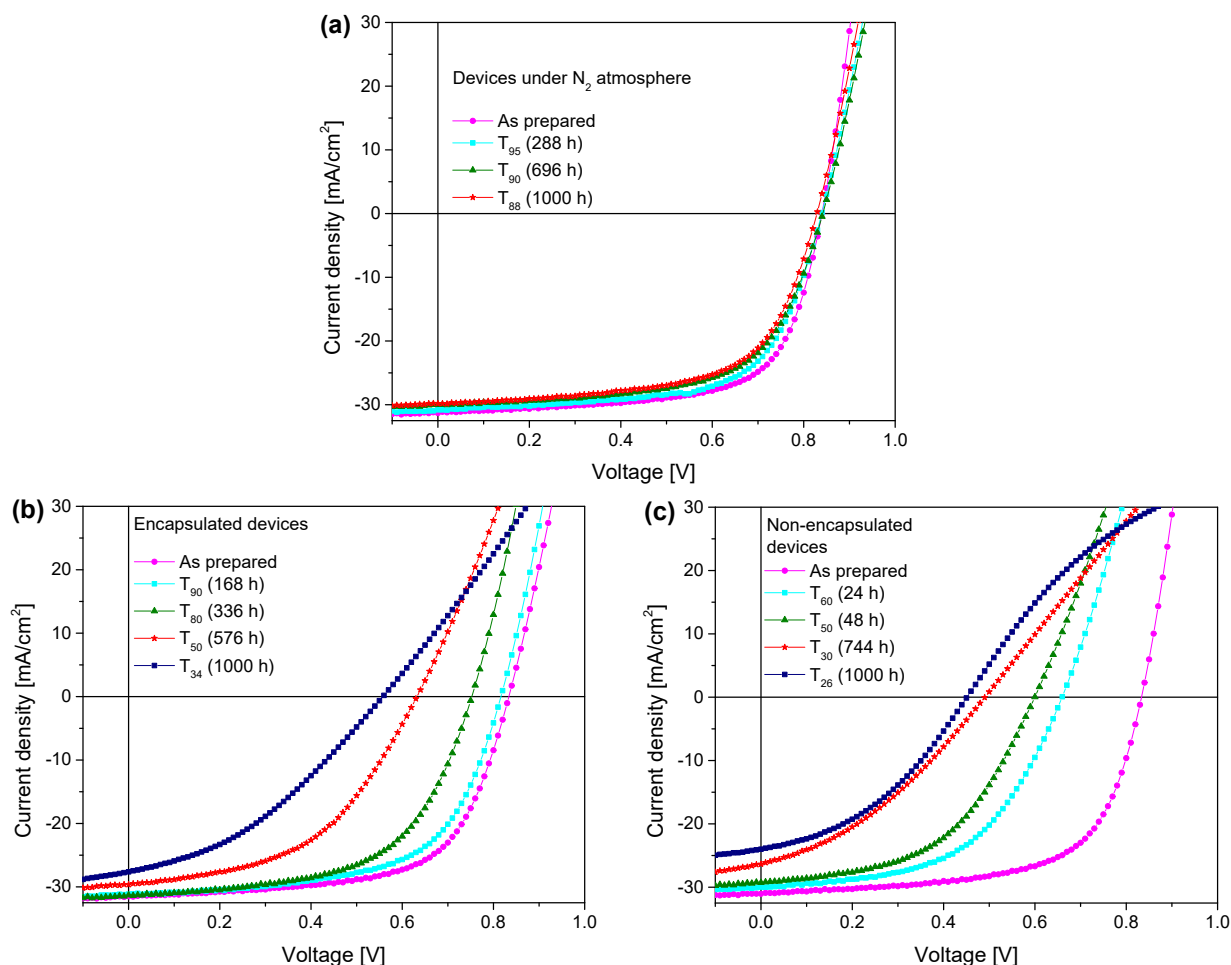

**Figure S1.** The current density-voltage (J-V) characteristics curves under illumination conditions of PM6:Y7 based NFA-OSCs under three different degradation conditions: (a) N<sub>2</sub> atmosphere, (b) encapsulated devices and (c) non-encapsulated both exposed under ambient environment over shelf storage time.

**Table S1.** Device performance parameters of the NFA-OSCs measured under AM 1.5G with 100 mW/cm<sup>2</sup> intensity exposed to three degradation conditions: N<sub>2</sub> atmosphere, encapsulated and non-encapsulated devices under ambient conditions. The row displays the average and the standard deviation of the photovoltaic parameters obtained from over 8 devices.

| Standard lifetime         | Time [h] | V <sub>OC</sub> [mV] | J <sub>SC</sub> [mA/cm <sup>2</sup> ] | FF [%]       | PCE <sub>avg</sub> [%] | PCE <sub>max</sub> [%] | R <sub>S</sub> [Ω cm <sup>2</sup> ] | R <sub>SH</sub> [Ω cm <sup>2</sup> ] |
|---------------------------|----------|----------------------|---------------------------------------|--------------|------------------------|------------------------|-------------------------------------|--------------------------------------|
| N <sub>2</sub> atmosphere |          |                      |                                       |              |                        |                        |                                     |                                      |
| T <sub>100</sub>          | 1        | 836 ± 5              | 31.30 ± 0.45                          | 66.63 ± 1.07 | 17.43 ± 0.30           | 17.53                  | 1.74 ± 0.14                         | 359 ± 79                             |
| T <sub>95</sub>           | 288      | 839 ± 4              | 30.35 ± 0.47                          | 64.65 ± 1.18 | 16.46 ± 0.41           | 16.71                  | 2.46 ± 0.40                         | 352 ± 120                            |
| T <sub>90</sub>           | 696      | 831 ± 4              | 30.84 ± 0.65                          | 61.57 ± 0.82 | 15.78 ± 0.14           | 15.84                  | 2.38 ± 0.21                         | 278 ± 62                             |
| T <sub>88</sub>           | 1000     | 830 ± 2              | 29.78 ± 0.04                          | 62.43 ± 0.40 | 15.43 ± 0.10           | 15.45                  | 2.69 ± 0.04                         | 309 ± 19                             |
| Encapsulated devices      |          |                      |                                       |              |                        |                        |                                     |                                      |
| T <sub>100</sub>          | 1        | 828 ± 7              | 31.25 ± 0.83                          | 65.00 ± 1.54 | 16.80 ± 0.12           | 16.97                  | 2.15 ± 0.63                         | 296 ± 134                            |
| T <sub>80</sub>           | 336      | 745 ± 8              | 31.40 ± 0.06                          | 57.99 ± 0.32 | 13.57 ± 0.16           | 13.63                  | 2.39 ± 0.01                         | 274 ± 26                             |
| T <sub>50</sub>           | 576      | 630 ± 2              | 28.92 ± 0.49                          | 48.39 ± 0.82 | 8.82 ± 0.18            | 9.06                   | 5.47 ± 0.23                         | 156 ± 21                             |
| T <sub>34</sub>           | 1000     | 556 ± 5              | 27.57 ± 0.15                          | 36.96 ± 0.39 | 5.67 ± 0.03            | 5.70                   | 10.10 ± 0.12                        | 71 ± 2                               |
| Non-encapsulated devices  |          |                      |                                       |              |                        |                        |                                     |                                      |
| T <sub>100</sub>          | 1        | 830 ± 2              | 30.59 ± 0.72                          | 64.70 ± 0.97 | 16.43 ± 0.30           | 16.46                  | 1.84 ± 0.02                         | 337 ± 72                             |
| T <sub>60</sub>           | 24       | 659 ± 4              | 29.80 ± 0.34                          | 53.30 ± 0.88 | 10.26 ± 0.22           | 10.52                  | 3.56 ± 0.21                         | 231 ± 22                             |
| T <sub>50</sub>           | 48       | 605 ± 5              | 29.06 ± 0.22                          | 47.48 ± 3.08 | 8.35 ± 0.54            | 8.89                   | 5.10 ± 0.82                         | 159 ± 15                             |
| T <sub>30</sub>           | 744      | 479 ± 11             | 26.33 ± 0.21                          | 38.09 ± 3.12 | 4.80 ± 0.35            | 5.30                   | 13.89 ± 2.75                        | 73 ± 16                              |

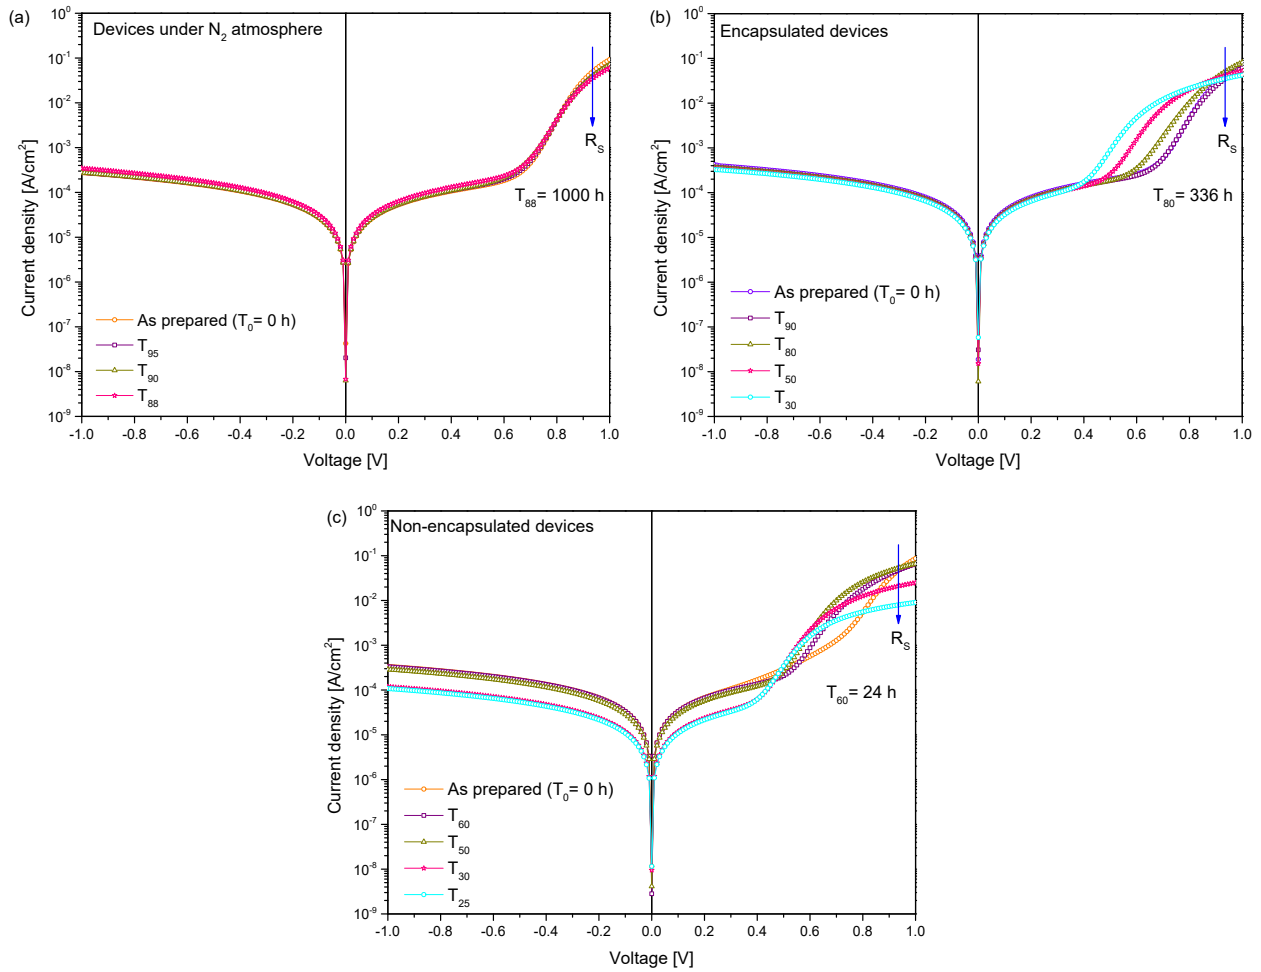

**Figure S2.** Dark J-V characteristic of PM6:Y7-based devices under degradation different conditions: (a) N<sub>2</sub> atmosphere, (b) encapsulated devices, and (c) non-encapsulated devices both exposed to ambient conditions over storage time.  $T_{80}$  and  $T_{60}$  are the time the devices took to decay 20% and 40% from their initial power conversion efficiency (PCE), respectively.

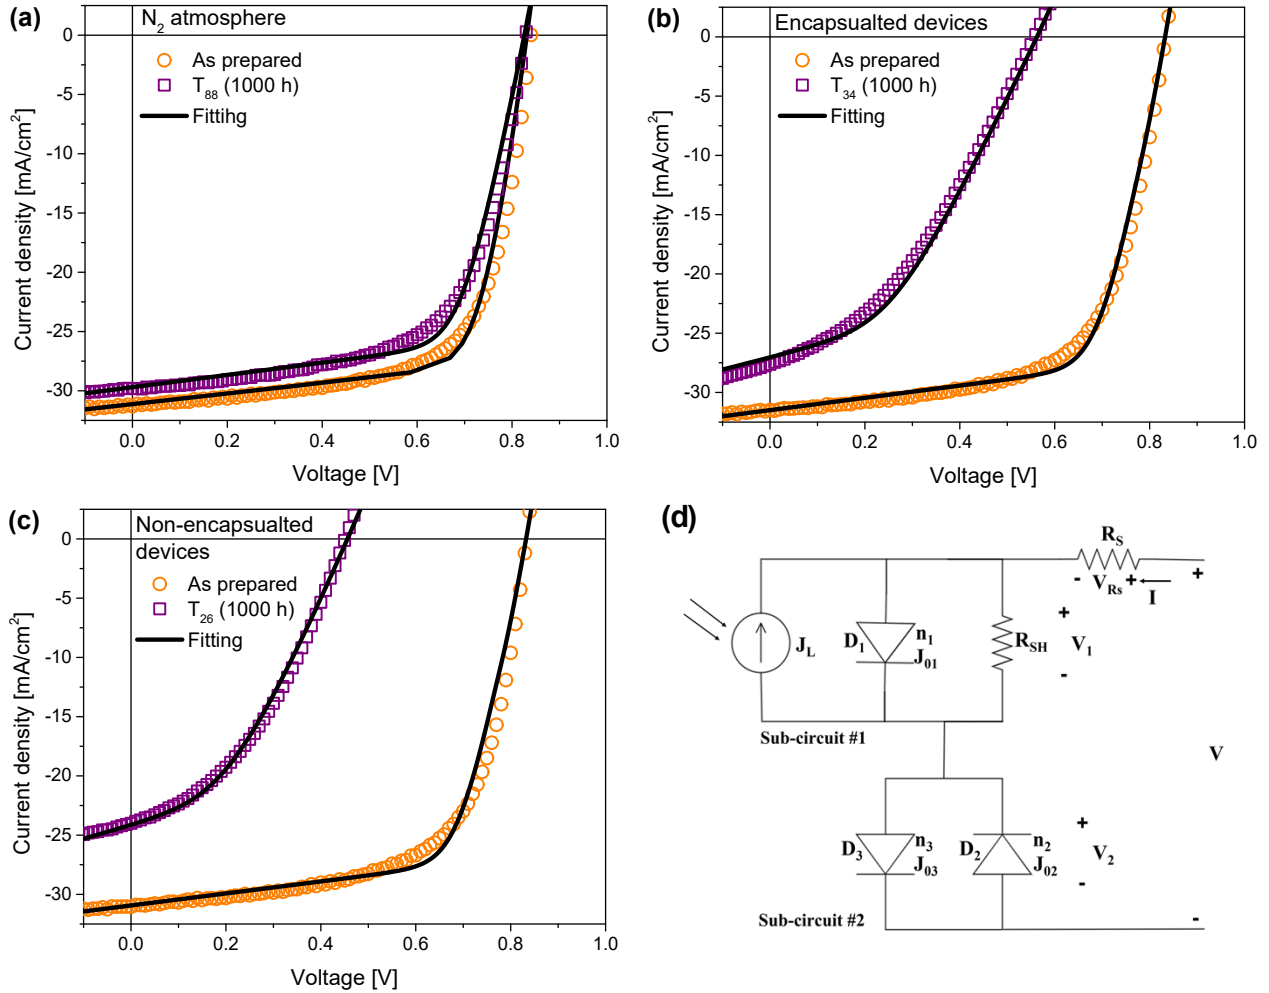

**Figure S3.** Fitting  $J$ - $V$  characteristic under AM 1.5 G illumination spectrum of fresh and degraded NFA-OSC at 1000 h exposed to degradation different conditions: (a)  $N_2$  atmosphere, (b) encapsulated devices, and (c) non-encapsulated devices both exposed to ambient conditions over storage time. (d) the equivalent circuit proposed by García-Sánchez et al.<sup>1,2</sup> used in this work for the fitting of the  $J$ - $V$  characteristic.

**Table S2.** The fitted parameters obtained from Circuital model shown in Fig. S3(d).

|                           | $J_L$<br>[mA/cm <sup>2</sup> ] | $n_1$ | $J_{01}$<br>[mA/cm <sup>2</sup> ] | $n_2$ | $J_{02}$<br>[mA/cm <sup>2</sup> ] | $n_3$ | $J_{03}$<br>[mA/cm <sup>2</sup> ] |
|---------------------------|--------------------------------|-------|-----------------------------------|-------|-----------------------------------|-------|-----------------------------------|
| N <sub>2</sub> atmosphere |                                |       |                                   |       |                                   |       |                                   |
| Fresh                     | 31.46                          | 1.10  | $5.86 \times 10^{-12}$            | -     | -                                 | -     | -                                 |
| T <sub>88</sub>           | 30.23                          | 1.17  | $3.74 \times 10^{-11}$            | 1.00  | 9.19                              | 1.00  | 8.89                              |
| Encapsulated devices      |                                |       |                                   |       |                                   |       |                                   |
| Fresh                     | 32.07                          | 1.11  | $7.30 \times 10^{-12}$            | -     | -                                 | -     | -                                 |
| T <sub>34</sub>           | 30.04                          | 1.40  | $7.30 \times 10^{-5}$             | 1.40  | 4.74                              | 1.20  | 9.09                              |
| Non-encapsulated devices  |                                |       |                                   |       |                                   |       |                                   |
| Fresh                     | 31.50                          | 1.11  | $7.19 \times 10^{-12}$            | -     | -                                 | -     | -                                 |
| T <sub>26</sub>           | 26.94                          | 1.50  | $1.69 \times 10^{-4}$             | 1.50  | 25.18                             | 1.30  | 11.09                             |

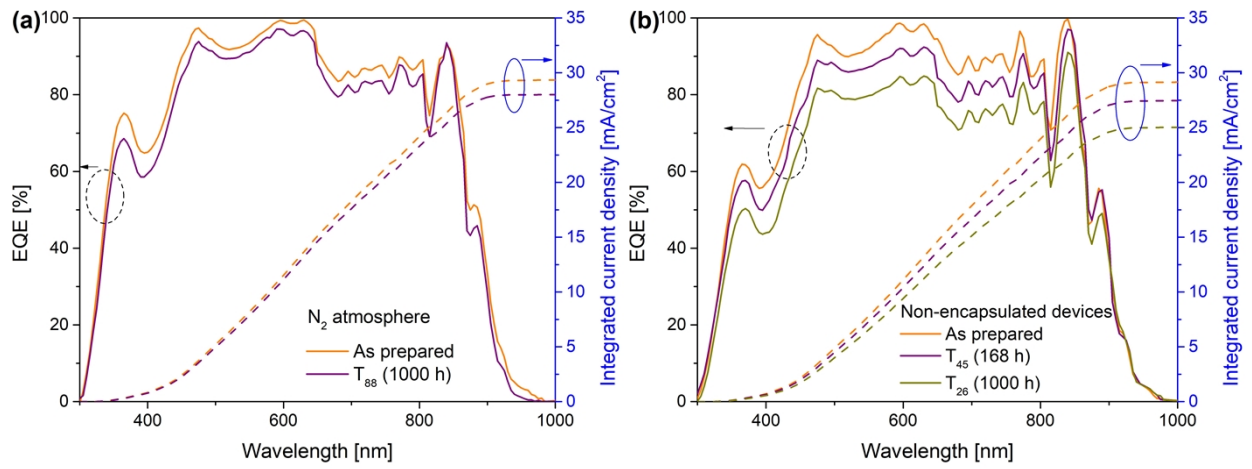

**Figure S4.** EQE spectra for NFA-OSCs exposed to (a) N<sub>2</sub> atmosphere, and (b) non-encapsulated cells.

**Table S3.** The fitted parameters, capacitance, and resistance values, of each layer for NF-OSCs exposed to N<sub>2</sub> atmosphere, encapsulated and non-encapsulated devices under ambient conditions. The IS measurement was carried out under AM1.5G at V<sub>OC</sub>. The values were extracted by using the circuit model shown in Figure 4(f) of the main article.

|                           | R <sub>1</sub><br>[Ω] | C <sub>1</sub><br>[nF] | R <sub>2</sub><br>[Ω] | C <sub>2</sub><br>[nF] | R <sub>3</sub><br>[Ω] | C <sub>3</sub><br>[nF] |
|---------------------------|-----------------------|------------------------|-----------------------|------------------------|-----------------------|------------------------|
| N <sub>2</sub> atmosphere |                       |                        |                       |                        |                       |                        |
| Fresh                     | 6                     | 5                      | 3                     | 2.8                    | 16                    | 26.6                   |
| T <sub>97</sub>           | 6.7                   | 5                      | 3.2                   | 2.8                    | 16.7                  | 26.6                   |
| T <sub>80</sub>           | 10.5                  | 5                      | 3.2                   | 2.8                    | 19                    | 26.6                   |
| T <sub>88</sub>           | 10.6                  | 5                      | 3.3                   | 2.8                    | 19.1                  | 26.6                   |
| Encapsulated devices      |                       |                        |                       |                        |                       |                        |
| Fresh                     | 8                     | 6                      | 3.5                   | 2.8                    | 16                    | 26.6                   |
| T <sub>90</sub>           | 15                    | 6.6                    | 3.5                   | 2.8                    | 24                    | 34.6                   |
| T <sub>34</sub>           | 27                    | 12                     | 10                    | 2.8                    | 30                    | 34.6                   |
| Non-encapsulated devices  |                       |                        |                       |                        |                       |                        |
| Fresh                     | 9                     | 6                      | 3                     | 2.8                    | 18                    | 26.6                   |
| T <sub>60</sub>           | 22                    | 8                      | 6                     | 2.8                    | 20.5                  | 39.6                   |
| T <sub>37</sub>           | 39.5                  | 9                      | 10                    | 3.5                    | 29.5                  | 45.6                   |
| T <sub>26</sub>           | 48                    | 12.5                   | 12.5                  | 3.5                    | 42                    | 55.6                   |

## SUPPLEMENTARY REFERENCES

- 1 F. J. García-Sánchez, D. Lugo-Muñoz, J. Muci and A. Ortiz-Conde, *IEEE J. Photovoltaics*, 2013, **3**, 330–335.
- 2 F. García-Sánchez, B. Romero, D. Lugo-Muñoz, P. Del, B. Arredondo, J. Liou and A. Ortiz-Conde, *Facta Univ. - Ser. Electron. Energ.*, 2017, **30**, 327–350.
